# Supplementary material
Source: PubMed Central journal article supplement (PMC536041)

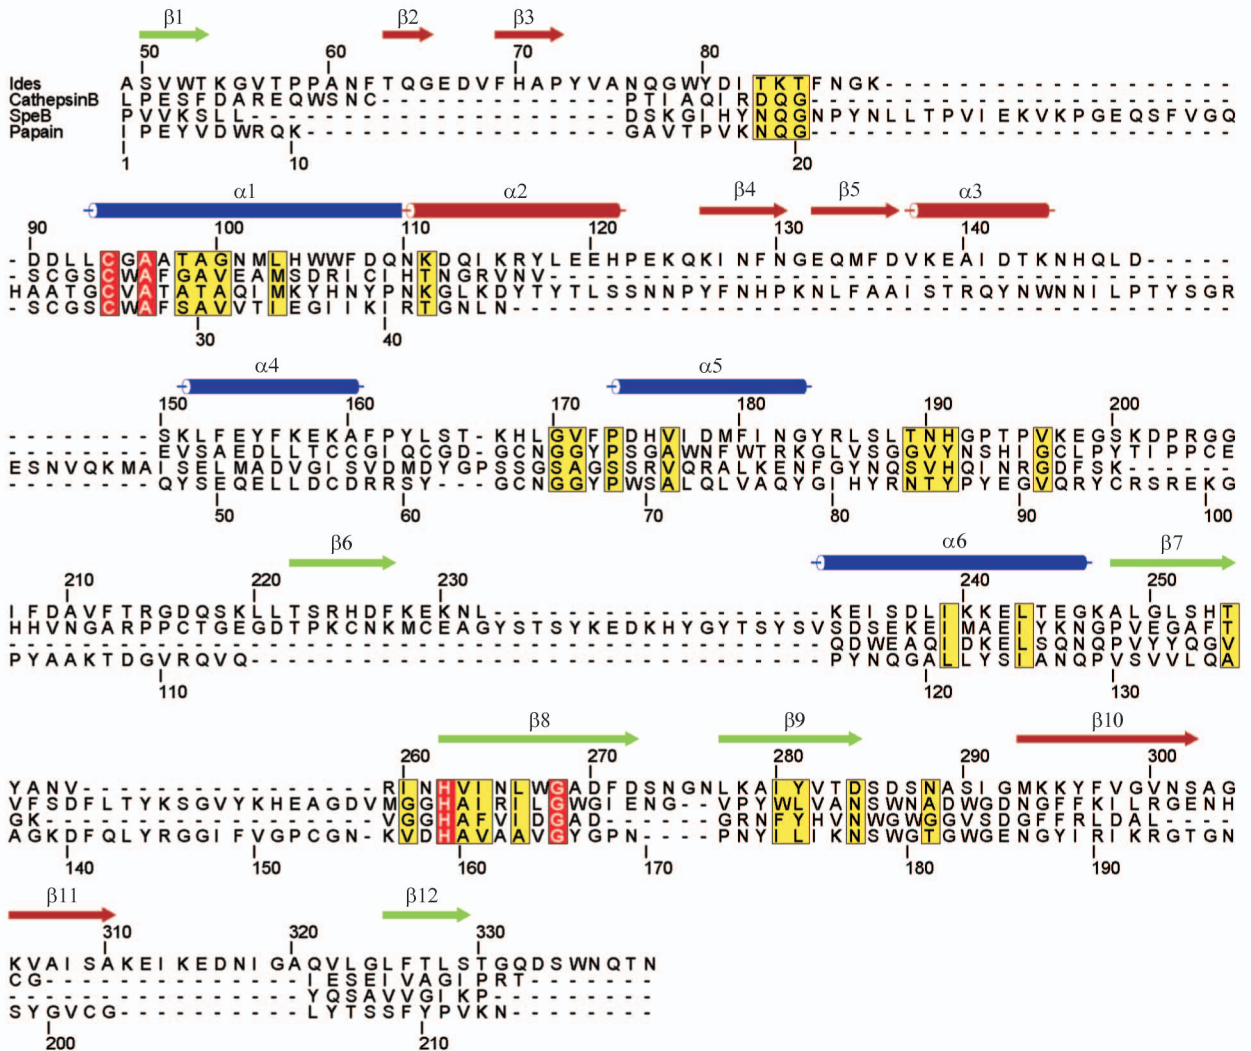

Supplement: pnas_101_50_17371__1.pdf [file pnas_101_50_17371__1.pdf]
